1 **Colder and drier winter conditions are associated with greater SARS-CoV-2 transmission: a**  
2 **regional study of the first epidemic wave in north-west hemisphere countries.**

3

4 Jordi Landier<sup>1\*</sup>, Juliette Paireau<sup>2,3</sup>, Stanislas Rebaudet<sup>1,4</sup>, Eva Legendre<sup>1</sup>, Laurent Lehot<sup>1</sup>, Arnaud  
5 Fontanet<sup>5,6</sup>, Simon Cauchemez<sup>2</sup>, Jean Gaudart<sup>7</sup>

6

7

Version 1.1, 27 January 2021

8

9 <sup>1</sup> IRD, Aix Marseille Univ, INSERM, SESSTIM, Marseille, France.

10 <sup>2</sup> Mathematical Modelling of Infectious Diseases Unit, Institut Pasteur, UMR2000, CNRS, Paris, France.

11 <sup>3</sup> Santé publique France, French National Public Health Agency, Saint Maurice, France

12 <sup>4</sup> Hôpital Européen Marseille, France.

13 <sup>5</sup> Emerging Infectious Diseases Unit, Institut Pasteur, Paris, France.

14 <sup>6</sup> PACRI Unit, Conservatoire National des Arts et Métiers, Paris, France.

15 <sup>7</sup> Aix Marseille Univ, APHM, INSERM, IRD, SESSTIM, Hop Timone, BioSTIC, Marseille, France.

16

17 \* corresponding author, [jordi.landier@ird.fr](mailto:jordi.landier@ird.fr)

18 **Abstract**

19 Higher transmissibility of SARS-CoV-2 in cold and dry weather conditions has been hypothesized since  
20 the onset of the COVID-19 pandemic but the level of epidemiological evidence remains low.

21 During the first wave of the pandemic, Spain, Italy, France, Portugal, Canada and USA presented an  
22 early spread, a heavy COVID-19 burden, and low initial public health response until lockdowns. In a  
23 context when testing was limited, we calculated the basic reproduction number (R0) in 63 regions from  
24 the growth in regional death counts. After adjusting for population density, early spread of the  
25 epidemic, and age structure, temperature and humidity were negatively associated to SARS-CoV-2  
26 transmissibility. A reduction of mean absolute humidity by 1g/m3 was associated with a 0.15-unit  
27 increase of R0. Below 10°C, a temperature reduction of 1°C was associated with a 0.16-unit increase  
28 of R0.

29 Our results confirm a dependency of SARS-CoV-2 transmissibility to weather conditions in the absence  
30 of control measures during the first wave. The transition from summer- to winter-like conditions likely  
31 contributed to the intensification of the second wave in north-west hemisphere countries.  
32 Adjustments of the levels of social mobility restrictions need to account for increased SARS-CoV-2  
33 transmissibility in winter conditions.

**NOTE: This preprint reports new research that has not been certified by peer review and should not be used to guide clinical practice.**

## 1 Introduction

2

3 The spread of SARS-CoV-2 in February-March 2020 caught the majority of European and North  
4 American countries unprepared. The spread of the virus was largely uncontrolled until movement  
5 restriction and social distancing policies were put in place at national or regional level with various  
6 degrees of intensity [1]. Most regions that implemented lockdowns experienced a peak in hospital  
7 admissions approximately 2 weeks after the lockdown was imposed, corresponding to infections  
8 acquired around the date of lockdown [2].

9 The spread of this first wave was largely heterogeneous between countries. Various determinants  
10 were proposed to explain the differential spread of the virus. Some Asian countries like Japan, South  
11 Korea, Vietnam and Thailand and some isolated countries like Australia, New Zealand, Iceland,  
12 experienced only limited transmission and stood out for high levels of preparedness and efficient  
13 response strategies. Even within South West European and North American countries where no  
14 effective response was deployed before lockdowns, SARS-CoV-2 virus spread heterogeneously at the  
15 regional level, as observed from hospitalization, death counts, and confirmed by serological surveys  
16 [3, 4].

17 Epidemic spread is characterized by the basic reproduction number, or  $R_0$ .  $R_0$  expresses the average  
18 number of secondary cases resulting from a given case in the context of a naive population.

19  $R_0$  depends on individual susceptibility to infection when in contact with an infective individual, and  
20 on the probability of an infectious contact. Environmental parameters affect  $R_0$ : population density  
21 may increase the probability of contacts between individuals and weather conditions may affect the  
22 survival of the virus or the individual susceptibility to an infection. Most known respiratory viruses  
23 spread during the cold season in the temperate Northern hemisphere [5]. Weather conditions in  
24 winter can also affect individual susceptibility to infection through irritation of the nasal mucosa, but  
25 also influence the behaviour of individuals towards conditions prone to transmission (living or  
26 gathering in closed, heated spaces with a dry atmosphere) [5]. In addition, temperature, humidity,  
27 and UV, might directly affect the virus survival and modify infectiousness [6, 7]. Individual preventive  
28 behaviours (masks), collective strategies reducing mobility and contacts (lockdowns) or limiting the  
29 duration of the infectious period (detection and isolation) modify the number of secondary cases and  
30 the effective reproduction number can be calculated, which accounts for these alterations in the  
31 “natural” history of transmission.

32 In spite of a large number of studies, the evidence regarding the link between weather conditions and  
33 SARS-CoV-2 transmission remains limited. At date of 15 May 2020, a systematic review retained 61  
34 studies analysing the relationship between COVID-19 epidemic and environmental factors [8].  
35 Methodological issues included the lack of controlling for confounding factors such as population  
36 density [8]. Inappropriate epidemiological and statistical methods were also pointed out [8, 9].  
37 Comparison between countries with different counter epidemic responses, testing strategy, or delayed  
38 onset of the epidemic might also have led to inconsistent results [8]. An earlier review retaining 17  
39 studies highlighted the risk of bias and the low level of available evidence [10]. Between 15 May 2020  
40 and 15 December 2020, our systematic search identified 82 research articles, of which only 15 (18%)  
41 analysed the growth rate or the reproduction number of SARS-CoV-2 (Appendix p2). Only four studies  
42 of climate and reproduction number included adjustments for confounding factors, and three of four  
43 included relevant covariates of population mobility, population density, and took into account  
44 interventions when necessary [11–13]. Of these, two were conducted over small geographical units:  
45 one study of 212 US counties identified a negative relationship between temperature increase and

1 SARS-CoV-2 growth, while the other study including 28 Japanese prefectures identified a positive  
2 relationship [11, 12]. The third study was at the global scale for 203 states (in the USA, Canada,  
3 Australia and China) or countries and identified a negative association between UV light exposure and  
4 SARS-CoV-2 growth. Temperature was negatively associated with growth only after adjustment for UV  
5 light exposure [13]. All three studies identified a positive association between population density and  
6 epidemic growth.

7 Overall, multiple studies described a negative relationship between temperature and COVID-19  
8 outcomes but the majority were unadjusted ecological correlation studies with strong risk of bias  
9 bringing low quality evidence [8], and evidence from multivariable growth studies remains ambiguous.

10 A modelling study defined the range of possible dependency between SARS-CoV-2 transmission and  
11 absolute humidity, based on two known coronaviruses and influenza [14], and recent models still do  
12 not include specific SARS-CoV-2 data [15]. More precise estimations of the effect of meteorological  
13 conditions on the spread of SARS-CoV-2 are required to better anticipate and inform policies regarding  
14 seasonal adjustments [16].

15 The objective of this study was to evaluate the contribution of weather parameters in the transmission  
16 of SARS-CoV-2, by analysing their effect on SARS-CoV-2 basic reproduction number in a context of low  
17 public health response during the early phase of the first wave in 6 north-western hemisphere  
18 countries.

## 19 Results

20

### 21 Region selection

22 The six countries (USA, Canada, Spain, Italy, France and Portugal) included 128 regions/states.  
23 Overseas regions (n=11) and regions which had experienced <10 cumulative deaths 28 days after  
24 lockdown (n=15) were not included (Figure 1). Likewise, regions with a maximal daily mortality <5  
25 deaths (n=19) within 28 days after lockdown were not included. Overall, 83 regions were assessed for  
26 exponential growth period, and R0 was calculated for 64 regions with sufficient exponential growth  
27 (Figure S1 in Appendix): 24 regions in the USA, 2 regions in Canada, 11 regions in France, 12 regions in  
28 Spain, 13 regions in Italy and 1 region in Portugal.

29

### 30 Data description

31 The maximal daily death count was 39 deaths/day in median (interquartile range (IQR)=18-83,  
32 max=779) and occurred 25 days (median; IQR=19-43) after the start of the lockdown. Of note, larger  
33 reductions in human mobility patterns after lockdown as assessed from google mobility led to shorter  
34 delay (Spearman correlation coefficient = 0.63, p<0.0001, Figure S3). The delay between the start of  
35 lockdown and the peak in daily death count was reduced to 19 days (median; IQR=17-27) for South  
36 European countries with nationwide lockdowns and strong mobility reductions (>60% in average,  
37 Figure S3).

38 R0 was estimated over an exponential growth period that had a median duration of 11 days (IQR=9-  
39 14, range=5-19). In The R0 estimation period started 5 days (median; IQR=0-8.5) and ended 16 days  
40 after the date of lockdown (IQR=11-21, range 1-27). Figure S4 presents details of the calculation  
41 periods.

1 The median R0 value was 2.58 (IQR=2.08-2.66). R0 estimates were lowest (<1.5) in two regions in  
2 France and one in Spain, the USA and Italy (respectively in Centre-Val de Loire, Nouvelle Aquitaine, La  
3 Rioja, Alabama and Abruzzo). R0 was highest (>4.0) in New York (USA), Lombardia and Piemonte (Italy),  
4 Castilla-La Mancha (Spain) and Ontario (Canada)(Figure 3A and B). Spain and Canada had overall higher  
5 R0 values compared to Italy, France and USA (Figure 4A). R0 values exhibited significant spatial  
6 autocorrelation (Moran's I=0.20, p=0.0087).

7 Covariates were heterogeneous between countries (Figure 3 and 4). Population density ranged  
8 between 82 and 1056 inhabitants/km<sup>2</sup> (median=271, Figure 3C and D) and was overall higher in Italy  
9 (Figure 4B). Mean absolute humidity during the transmission period was 4.98g/m<sup>3</sup> in median  
10 (IQR=4.29-5.99, range=2.26-11.32, Figure 3E and F) corresponding to a median dew point of 3.7°C  
11 (IQR=0.9-6.3, range=-7.7 – +15.3). Mean temperature was 9.8°C in median (IQR=7.1-11.5, range=-2.0-  
12 19.9). Distance to the first region with 10 cumulative deaths was 406km in median (IQR=228-794) and  
13 much larger in the USA compared to European countries (Figure 4F).

14

### 15 **Factors associated with R0**

16 Each variable was included in a univariate model assuming linear (Figure 5, Table S2) or non-linear  
17 (spline smoothing, Table S3) relationships with R0. We identified significant relationships between R0  
18 value and temperature, absolute humidity or dew point, average daily rainfall, but not with mean wind  
19 speed over the transmission period.

20 Multivariable models were constructed according to the DAG. After adjustment for distance to the  
21 nearest affected region, percentage of population over 80 and population density, there was a  
22 consistent relationship between increasing temperature, AH or dew point temperature, and  
23 decreasing R0. No relationship was found with average daily rainfall.

24 Mean temperature led to the model with the largest deviance explained compared to models including  
25 minimum or maximum temperature, or any AH or dew point temperature (Table 1). In this model, a  
26 10-fold (+1 log<sub>10</sub> unit) increase in population density was associated with a +0.67 R0 unit increase  
27 (95%CI=0.05-1.28). The proportion of population aged 80 years and older was not significantly  
28 associated with R0. The relationship between mean temperature and R0 was not linear. A strong,  
29 nearly linear drop of approximately 1.0 R0 unit was observed between 2.5 and 12°C, and a plateau  
30 beyond 12°C (Figure 6 and 7). The residuals from this model did not exhibit significant spatial  
31 autocorrelation (Moran's I=0.054, p=0.215).

32 Mean AH and mean dew point values exhibited similar profiles with increasing values associate with  
33 decreasing R0 values (Table 1, Figure 6). In spite of the narrower range of values, it seemed that the  
34 relationship between R0 and AH or dew point temperature did not reach a plateau (Figure 7). Assuming  
35 a linear relationship, a 1 g/m<sup>3</sup> higher absolute humidity translated in a 0.15 unit lower regional R0,  
36 respectively a 1°C higher dew point temperature translated in a 0.08 unit lower R0 (Table S5).

37

### 38 **Sensitivity analyses**

39 Using lagged weather summary values as linear univariate predictors, our statistical model found  
40 similar relationships between R0 and temperature variables, but 0-, 1- and 5-week lags led to the  
41 strongest effect for mean AH and mean DP (Figure S5). Using lagged weather summary values as non-  
42 linear predictors in the multivariate model, the shapes of the relationships between temperature, AH  
43 and DP remained similar, with a nearly linear drop reaching a plateau at values corresponding to milder  
44 winter weather/climate (Figure S6). Overall, correlations were strong between weather summary

1 observations at the different lags (Figure S7). Correlations of lagged temperature and humidity  
2 observations was highest between -1, 0, 1 and 5-week lagged observations compared to other lags.  
3 When setting the upper limit of the R0 calculation window to 18-day after date of lockdown, 10  
4 additional regions were excluded and the analysis was conducted on 53 regions. After adjusting for  
5 population density, population over 80 and distance to the first region affected, the non-linear  
6 negative relationship between R0 and temperature remained unchanged, reaching a plateau around  
7 10°C (spline p-value=0.0475). The shape of the relationship between AH, respectively DP, and R0  
8 remained similar but did not reach statistical significance (p-value=0.19). Later AH or DP summary  
9 values, corresponding to 1 week later than the estimated transmission period (i.e. 2-week lag from R0  
10 calculation period), restored the negative relationship with R0 (p=0.0661, respectively p=0.0667).  
11 Fitting continent-specific splines for weather covariates, also resulted in low statistical power: only 37  
12 regions remained in South Europe and 26 in North America. After adjusting for population density,  
13 population over 80 and distance to the first region affected, humidity variables (AH or dew point)  
14 retained a negative association with R0 (continent-specific spline p-values were 0.0915 (North  
15 America) and 0.0988 (South Europe) for AH, respectively 0.0506 and 0.1078 for dew point  
16 temperature). The relationship between R0 and mean temperature was markedly different between  
17 North America (negative association, p=0.005) and South Europe (p=0.17).

## 18 Discussion

19  
20 In this study, we analysed SARS-CoV-2 propagation parameter R0 during the first wave of the pandemic  
21 in 63 regions of 6 north western countries. We showed that R0 values were influenced by population  
22 density (+0.6 for a 10-fold increase in density), by proximity with the first epidemic focus of the country  
23 or coast for USA (-0.3 for a 10-fold increase in distance to the first region to record 10 COVID-19  
24 deaths), and by weather or climate conditions. For regions with mean temperatures below 10°C during  
25 the transmission period, a linear association was observed with R0 values: a 1°C increase in  
26 temperature between regions was associated with a 0.16-unit decrease in R0. A 1 g/m<sup>3</sup> increase in  
27 mean absolute humidity was associated with a 0.15-unit decrease in R0. Similar results were obtained  
28 with dew point temperatures, with a 1°C increase associated with a 0.08-unit decrease in R0 (Table  
29 S5). After adjusting for major confounders and spatial autocorrelation, our results indicate that  
30 weather conditions brought a significant contribution to drive the magnitude of the first wave, even if  
31 it was limited by an initial heterogeneous spread of the virus, which protected regions located furthest  
32 away from the first foci.

33  
34 This study relied on a regional scale analysis and accounted for different dynamics within the same  
35 country. The overall epidemic wave at country level was actually the sum of diverse dynamics, as is  
36 obvious for large countries but also true for Spain, Italy or France, where regions were heterogeneously  
37 affected, as confirmed by serological studies [3, 17]. Likewise, weather or climate heterogeneity  
38 between regions of a given country was large. By analyzing distinct spatial units with heterogeneous  
39 population density and weather, we were able to assess the effect of parameters that may be  
40 otherwise confounded by country-level parameters such as response strategy, timing of the analysis  
41 period compared to the progression of the epidemic, but also age structure of the population.

42 The 6 countries were selected due to their homogeneous location in the northern hemisphere  
43 between 25 and 50 degrees of latitude and the low efficacy of their counter epidemic responses until

1 a lockdown was decreed. We are therefore as close as possible of conditions allowing  $R_0$  estimation.  
2 This 4-parameter hierarchical generalized additive model provides an explanation of up to 45% of  $R_0$   
3 variability across 63 affected regions of the northern hemisphere, thus providing useful insights on the  
4 drivers of the first wave, and allowing to estimate the contribution of population density and weather  
5 conditions for the next waves, when the effect of local introduction is no longer relevant.

6 We acknowledge several limits. The first one is the necessity to rely on death counts to estimate  $R_0$   
7 during this wave due to the lack of information on actual infections from limited testing and the lack  
8 of consistency between countries for hospitalization counts. This assumption is similar to usual  
9 assumptions for  $R_0$  estimation based on diagnosed cases, since true number of infections remains  
10 unknown and detection occurs at variable delays after infection.

11 A second limit is the use of a single summary weather observation over the assumed transmission  
12 period, which may fail to express the dynamical aspects of weather. The choice of fixed, 1-week  
13 increments to study the effect variations in the weather summary window may be too coarse to  
14 capture effects for narrow exponential growth periods. The sensitivity analysis showed a slight increase  
15 in effect when considering weather summary values calculated 1 week earlier than the estimated  
16 transmission period, but the 18-day sensitivity analysis showed a stronger negative relationship  
17 between  $R_0$  and AH summary values corresponding to 1-week later than the estimated transmission  
18 period. The role of the weather conditions might be more important during the beginning of the  
19 exponential growth period, until a sufficiently large number of persons becomes infected and  
20 parameters such as population density become increasingly important. This study could also only  
21 evaluate the effect of a limited range of weather conditions on SARS-CoV-2 transmission, since the  
22 number of observations with a mean temperature below  $2.5^\circ\text{C}$  or above  $15^\circ\text{C}$  was low. This prevents  
23 from analyzing the effect of higher temperatures such as during autumn. This restriction was however  
24 necessary to achieve a minimal homogeneity of the studied regions in terms of their exposure and  
25 response to the pandemic. Finally, this analysis includes only 63 regions and may lack statistical power.  
26 The necessity to ensure that the epidemic growth of deaths was sufficient led to the exclusion of  
27 regions that may be affected, but not enough for daily deaths counts to reach 10 deaths/day.

28 Finally, this study showed an association between SARS-CoV-2  $R_0$  and temperature/absolute humidity,  
29 but due to the strong correlation between absolute humidity and temperature in the seasonal  
30 conditions analysed here, it is difficult to determine which parameter is more important and they could  
31 not be analysed in combination [18]. The continent-specific analysis suggests that the relationship  
32 between absolute humidity and  $R_0$  was more stable than that of temperature, which was strong in the  
33 US but less so in South Europe. We could not conclude whether the relationship results from a direct  
34 role of weather on individual susceptibility to viral invasion (*e.g.* dry nasal mucosa from indoors heating  
35 and outdoors cold) or on viral persistence/survival, or from an indirect role of climate on human  
36 behaviors (*e.g.* regions with cold winter favor more indoors living conditions and lead to bigger  
37 infection opportunities).

## 38 **Conclusion**

39 Our study shows an important dependency of SARS-CoV-2 transmission to weather/climate, with a  
40 0.16-unit increase in  $R_0$  for a  $1^\circ\text{C}$  difference in mean regional temperature below  $10^\circ\text{C}$ , or a 0.15-unit  
41 increase for a  $-1\text{g}/\text{m}^3$  decrease in absolute humidity. Northern hemisphere countries experienced a  
42 second wave of SARS-CoV-2 infections during autumnal transition from summer to winter, while still  
43 actively maintaining control strategies. When planning to adjust the level of restrictions on social  
44 activities, public health strategies need to account for the increased transmissibility of SARS-CoV-2  
45 when/where cold and dry winter conditions are prevalent.

## 1 Material and methods

2

### 3 Study design

4 In order to compare the drivers of the epidemic dynamics between regions accurately, we calculated  
5 the basic reproduction number ( $R_0$ ) of the virus for each region affected by the first wave of COVID-19  
6 epidemic in six countries, using the dynamics of the daily death counts. These six countries were  
7 located in the western part of the northern hemisphere, approximately between 25 and 50° of latitude  
8 (Figure S1). These countries experienced winter conditions and underwent significant SARS-CoV-2  
9 transmission in a context of low public health response at the start of the first wave of the epidemic.

10 This analysis was conducted at the first administrative subdivision country, here referred to as  
11 “region”. Regions corresponded to States in USA and Canada, autonomous communities in Spain, and  
12 regions in Italy (regioni), Portugal (região) and France (regions).

13 Confirmed case counts were insufficiently reliable due to overall lack of tests and different testing  
14 strategies between countries, between regions of the same country and between periods for the same  
15 region. Hospitalization counts were not available consistently at regional level across countries.  
16 Overall, COVID-19 deaths were preferred as they were less likely to have different definitions within  
17 the same region or country and to undergo significant changes over the study period.  $R_0$  is an indicator  
18 of the speed of progression of the outbreak, and was therefore less likely to be biased compared to  
19 indicators based on cumulative counts or cumulative incidence rates. Estimating  $R_0$  values based on  
20 deaths counts relies on the minimal assumption that the infection-fatality rate was constant over the  
21 study period (~1 month) for a given region, which defined a proportional relationship between  
22 infections and deaths.

23

### 24 Study period

25 We included COVID-19 death count data starting at the date when 10 cumulative deaths were reached  
26 in a given region, and ending 28 days after lockdown.

27 The lower boundary of 10 cumulative deaths was chosen to avoid early stochasticity and limitations in  
28 the available recordings of the first COVID-19 deaths at regional level.

29 The upper boundary of 28 days after lockdown was defined to avoid the influence of lockdown  
30 measures on the growth rate of death counts, since we aimed to estimate SARS-CoV-2  $R_0$  prior to  
31 implementation of major interventions. At individual level, the median delay between infection and  
32 death was 18 days, with a large interquartile range (IQR) of 9 to 24 days [19–25]. At regional level, we  
33 assumed that reported deaths corresponded to transmission events which had occurred in median 3  
34 weeks earlier, and defined a 28-day boundary to cover the upper limit of the IQR.

35

## 1 **Data**

### 2 **Deaths from COVID-19**

3 Regional level data on COVID-19 deaths were retrieved from data shared by national health ministries  
4 and/or public health agencies of Spain, Italy, Portugal, France, United States of America, and Canada  
5 (Table S1). Deaths were reported as daily new death counts or as a cumulative number.

6

### 7 **Population and geographical data**

8 Population structure by one- or five-year age groups, sex and region was retrieved from open access  
9 data shared by national institutes or administrations responsible for national statistics or demography  
10 (Table S1). The percentage of the region population aged  $\geq 70$  or  $\geq 80$  years was calculated in order to  
11 adjust for differences in way of life (e.g. rural regions have older population than metropolitan areas  
12 in Europe).

13 Region shapefiles by country were obtained from national geographical authorities, open source  
14 datasets or as provided in the coronavirus open data packages proposed by several national health  
15 agencies (Table S1). The region surface was either obtained from the geographical layer (land surface  
16 area), or calculated from the polygon extent. We estimated the percentage of each region surface with  
17  $\geq 5$  inhabitants per  $\text{km}^2$  based on WorldPop 2020 raster dataset [26]. Population density was estimated  
18 as the population in the region divided by the surface after excluding areas  $< 5$  inhabitants/ $\text{km}^2$  in order  
19 to limit the underestimation of population density when high heterogeneity existed between urban  
20 centers and sparsely populated territories within the same region (deserts, mountains, polar regions).

21

### 22 **Weather/climate**

23 Weather station reports since 1 January 2020 were obtained from US National Oceanic and  
24 Atmospheric Administration (NOAA) through the R-package {worldmet}. We extracted hourly  
25 temperature, relative humidity (RH), dew point (DP), precipitation and windspeed observations for  
26 each station. Hourly absolute humidity (AH, in  $\text{g}/\text{m}^3$ ) was calculated from RH and temperature based  
27 on the Clausius-Clapeyron formula [27]. Daily minimum, maximum and mean values were calculated  
28 for temperature, AH, RH, dew point, as well as cumulative sum of precipitation and mean wind speed.  
29 Days with  $\geq 5$  missing hourly record (no observation of any parameter) were excluded.

30 Each region was attributed stations based on geographic location. All available observations in weather  
31 stations of the region contributed to the regional daily average. Weather stations can be located in  
32 mountains or inhabited locations where they record weather conditions that differ strongly from  
33 actual populated areas of the same region. To avoid this bias, observations were assigned population-  
34 based weights: we estimated the population located within 10 km of each weather station using  
35 WorldPop 2020 data; and for each day and each region, we calculated the total population within 10km  
36 of any station reporting data for that day. Daily station observations were weighted in proportion of  
37 the population around each station relative to the total population. Stations located within 10-km of  
38 each other were included in a single buffer and each station was assigned equal weight within the  
39 buffer.

40 For each weather parameter, the regional summary value was calculated over the transmission period,  
41 during which infections were assumed to have occurred. We assumed that the transmission period



1 had the same duration as the R0 calculation period, and occurred 3 weeks earlier according to the  
2 delay between infection and death (Figure S8).

3 Using this approach, the weather parameters averaged over the assumed transmission period and over  
4 each region included: minimum, mean and maximum average values for temperature, relative  
5 humidity, absolute humidity, dew point, average cumulative rainfall per day and average wind speed.

6

#### 7 **Date of lockdown definition**

8 Lockdown date was defined using Google mobility data as the date when a decrease >25% in workplace  
9 localization was reported and sustained over 3 days in the region [28]. All references to a « date of  
10 lockdown » hereafter refer to this definition. This definition matched national lockdowns in European  
11 countries. This simplification was necessary due to the heterogeneity in social distancing measures  
12 taken at regional (state) level in the USA and Canada. The objective was to exclude periods where  
13 transmission would start to slow down due to these measures.

14

#### 15 **Distance to first region with 10 cumulative deaths**

16 For each of the four European countries considered, we identified the first region with 10 cumulative  
17 deaths was defined. In Portugal, two regions reached  $\geq 10$  deaths on the same day, and the region with  
18 the highest count (14 versus 12) was selected. Within each country, the euclidean distance in  
19 kilometers between the main city in each region and the main city in the first region above 10  
20 cumulative deaths was calculated to reflect spatial autocorrelation due to proximity in the spread of  
21 the epidemic. In the USA and Canada, the distance to the first region above 10 cumulative deaths was  
22 calculated separately for East Coast and West Coast, using the limit between Central and Mountain  
23 time zones. This was necessary due to the early start of the epidemic in the state of Washington, which  
24 reached 10 deaths by 2 March 2020, 16 days before the next state (New York on 18 March).

25

#### 26 **Statistical methods**

27 Statistical analyses were performed using R version 4.0. Maps were produced using ArcGIS 10.7.1.

28

#### 29 ***R0 estimation***

30 Daily death counts were smoothed using a 5-day moving average filter to account for irregularities in  
31 data transmission and publication.

32 For each region, the exponential growth period was estimated using a  $\log(\text{deaths})=f(\text{time})$   
33 representation and  $r$  (the exponential growth rate) was extracted as the coefficient of a Poisson  
34 regression. R0 was calculated for each region using the generation time method assuming a gamma  
35 distribution with parameters 7 and 5.2 for SARS-CoV-2 generation time [29, 30]. In order to improve  
36 the adjustment of the regression, the start and end dates of the calculation period were allowed to  
37 shift by up to 2 days (+/-1 day or +1/+2 days for start date if the calculation period began at the date  
38 of 10 cumulative deaths) using the built-in function `sensitivity.analysis()` of the package {R0} [31].

39

1 **Exclusion criteria**

2 Regions where the smoothed daily death count stayed <5 deaths/day during the study period were  
3 not included. Region where the smoothed daily death count stayed <10 deaths/day during the linear  
4 growth phase were excluded. This limited the study to regions having displayed a clear exponential  
5 growth phase.

6 One Italian region was excluded because there was no weather station data available except for 2  
7 stations >2000m altitude.

8

9 **Analysis of the relationship between R0 and weather parameters**

10 A directed acyclic graph (DAG) was constructed using Dagitty v3.0 web-based application  
11 (<http://www.dagitty.net/dags.html>) in order to visualise the relationships between R0 and the  
12 explanatory covariates (Figure S2). Dependence and independence assumptions were verified using  
13 Spearman correlation coefficient.

14 Relative humidity values are temperature-dependent and absolute humidity or dew point  
15 temperatures are also strongly correlated to temperature [18]. The different weather covariates were  
16 observed during the estimated transmission period, which corresponded to the R0 calculation period  
17 lagged by 3 weeks to account for delay between infection and death. Weather covariates were  
18 included separately in the models. A generalized additive mixed model (gamm) regression was used to  
19 evaluate the effects of climate, population and other determinants on the value of R0, using a Gaussian  
20 distribution and the identity link function (package {mgcv}). A country-level random effect was  
21 included to account for within-country correlations. Canada presented with only 2 regions and was  
22 grouped with the USA for random effect, while the single region in Portugal was grouped with Spain.  
23 Univariate analyses were conducted assuming linear and non-linear effects, using B-splines to model  
24 non-linear effect of covariates. Models were compared using the percentage of deviance explained  
25 and Akaike's Information Criterion.

26 We verified presence/absence of spatial autocorrelation in R0 values and in the final model residuals  
27 by calculating Moran's I.

28

29 **Sensitivity analyses**

30 First, we assessed the importance of the 3-week delay for weather variables (corresponding to the  
31 delay between transmission period and R0 calculation period based on death count exponential  
32 growth). For this, we tested a variety of lags from -1 to 5 weeks from that estimated transmission  
33 period (*i.e.* 2 to 8 weeks from the R0 calculation period). The longer lags were likely irrelevant for actual  
34 transmission but aimed at identifying climate trends rather than weather influence. We included them  
35 as linear explanatory variables in the univariable hierarchical model or as non-linear explanatory  
36 variables in the multivariable hierarchical generalised additive model.

37 Second, we assessed the effect of the 28-day window to define the exponential growth period by using  
38 a narrower window ending 18 days after date of lockdown. We recalculated R0 for regions where the  
39 linear growth period retained for the main analysis extended beyond the 18-day limit, and followed  
40 the same plan as the main analysis.

1 Third, we assessed possible continent specific effects by fitting continent-specific splines for weather  
2 variables in the final multivariate models.

3

#### 4 **Data availability**

5 All data used in this study was obtained from publicly available data sources, listed in Table S1. The  
6 only exception corresponded to early death counts at regional level in France which were obtained  
7 directly from the French Public Health Agency but have been publicly released since. The data table of  
8 regional-level values (R0 estimates, weather summary, population density etc) used for the  
9 hierarchical generalized additive model analysis of the relationship between regional level R0 and  
10 weather covariates is provided in a supplementary csv file.

11

#### 12 **Code availability**

13 No custom code was used for this study beyond usual application of standard functions of softwares  
14 or R packages.

15

#### 16 **Authors' contribution**

17 JL, JG, SC and AF designed the study. JL conducted the analysis with methodological contributions of  
18 JP, EL, and LL. JL JP EL LL AF SC JG contributed to interpreting the results and editing the manuscript.

19

#### 20 **Acknowledgements**

21 The authors would like to thank Laurax Simgiane Ferbliegas from Hab' lab Marseille and L. Jae for  
22 help and support in retrieving multi-country regional data.

## 1   References

- 2   1. Flaxman S, Mishra S, Gandy A, Unwin HJT, Mellan TA, Coupland H, et al. Estimating the effects of  
3   non-pharmaceutical interventions on COVID-19 in Europe. *Nature*. 2020;584:257–61.  
4   doi:10.1038/s41586-020-2405-7.
- 5   2. Cauchemez S, Kiem CT, Paireau J, Rolland P, Fontanet A. Lockdown impact on COVID-19 epidemics  
6   in regions across metropolitan France. *The Lancet*. 2020;396:1068–9. doi:10.1016/S0140-  
7   6736(20)32034-1.
- 8   3. Pollán M, Pérez-Gómez B, Pastor-Barriuso R, Oteo J, Hernán MA, Pérez-Olmeda M, et al.  
9   Prevalence of SARS-CoV-2 in Spain (ENE-COVID): a nationwide, population-based seroepidemiological  
10   study. *Lancet*. 2020;396:535–44.
- 11   4. Lai C, Wang J, Hsueh P. Population-based seroprevalence surveys of anti-SARS-CoV-2 antibody : An  
12   up-to-date review. *Int J Infect Dis*. 2020;101:314–22.
- 13   5. Moriyama M, Hugentobler WJ, Iwasaki A. Seasonality of Respiratory Viral Infections. *Annu Rev*  
14   *Viro*. 2020;7:83–101. doi:10.1146/annurev-virology-012420-022445.
- 15   6. Matson MJ, Yinda CK, Seifert SN, Bushmaker T, Fischer RJ, Doremalen N Van, et al. Effect of  
16   Environmental Conditions on SARS-CoV-2 Stability in Human Nasal Mucus and Sputum. *Emerg Infect*  
17   *Dis*. 2020;26:9–11.
- 18   7. Morris DH, Claude Yinda K, Gamble A, Rossine FW, Bushmaker T, Fischer RJ, et al. Mechanistic  
19   theory predicts the effects of temperature 1 and humidity on inactivation of SARS-CoV-2 and 2 other  
20   enveloped viruses. 2020. doi:10.1101/2020.10.16.341883.
- 21   8. Briz-Redón Á, Serrano-Aroca Á. The effect of climate on the spread of the COVID-19 pandemic: A  
22   review of findings, and statistical and modelling techniques. *Prog Phys Geogr*. 2020;44:591–604.
- 23   9. Gillibert A, Jaureguiberry S, Hansmann Y, Argemi X, Landier J, Caumes E, et al. Comment on A.  
24   annua and A. afra infusions vs. Artesunate-amodiaquine (ASAQ) in treating *Plasmodium falciparum*  
25   malaria in a large scale, double blind, randomized clinical trial. *Phytomedicine*. 2019; in press:152981.  
26   doi:10.1016/j.phymed.2019.152981.
- 27   10. Mecnas P, da Rosa Moreira Bastos RT, Rosário Vallinoto AC, Normando D. Effects of  
28   temperature and humidity on the spread of COVID-19: A systematic review. *PLoS One*. 2020;15 9  
29   September:1–21.
- 30   11. Azuma K, Kagi N, Kim H, Hayashi M. Impact of climate and ambient air pollution on the epidemic  
31   growth during COVID-19 outbreak in Japan. *Environ Res*. 2020;190:110042.
- 32   12. Rubin D, Huang J, Fisher BT, Gasparrini A, Tam V, Song L, et al. Association of Social Distancing,  
33   Population Density, and Temperature With the Instantaneous Reproduction Number of SARS-CoV-2  
34   in Counties Across the United States. *JAMA Netw open*. 2020;3:e2016099.
- 35   13. Merow C, Urban MC. Seasonality and uncertainty in global COVID-19 growth rates. *Proc Natl*  
36   *Acad Sci U S A*. 2020;117:27456–64.
- 37   14. Baker RE, Yang W, Vecchi GA, Metcalf CJE, Grenfell BT. Susceptible supply limits the role of  
38   climate in the early SARS-CoV-2 pandemic. *Science (80- )*. 2020;369:315–9.
- 39   15. Saad-roy CM, Wagner CE, Baker RE, Morris SE, Farrar J, Graham AL, et al. Immune life history,  
40   vaccination, and the dynamics of SARS-CoV-2 over the next 5 years. *Science (80- )*. 2020;818  
41   November:811–8.
- 42   16. Zaitchik BF, Sweijd N, Shumake-Guillemot J, Morse A, Gordon C, Marty A, et al. A framework for  
43   research linking weather, climate and COVID-19. *Nat Commun*. 2020;11:19–21. doi:10.1038/s41467-  
44   020-19546-7.

- 1 17. Warszawski J, Bajos N, Meyer L, de Lamballerie X, Seng R, Beaumont A-L, et al. In May 2020, 4.5%  
2 of population in metropolitan France developed antibodies against SARS-CoV-2: first results from  
3 the national survey EpiCov [french]. 2020.
- 4 18. Babin S. Use of Weather Variables in SARS-CoV-2 Transmission Studies. *Int J Infect Dis.*  
5 2020;100:333–6.
- 6 19. Wiersinga WJ, Rhodes A, Cheng AC, Peacock SJ, Prescott HC. Pathophysiology, Transmission,  
7 Diagnosis, and Treatment of Coronavirus Disease 2019 (COVID-19): A Review. *JAMA - J Am Med*  
8 *Assoc.* 2020;324:782–93.
- 9 20. Bi Q, Wu Y, Mei S, Ye C, Zou X, Zhang Z, et al. Epidemiology and transmission of COVID-19 in 391  
10 cases and 1286 of their close contacts in Shenzhen, China: a retrospective cohort study. *Lancet Infect*  
11 *Dis.* 2020;20:911–9.
- 12 21. Richardson S, Hirsch JS, Narasimhan M, Crawford JM, McGinn T, Davidson KW, et al. Presenting  
13 Characteristics, Comorbidities, and Outcomes among 5700 Patients Hospitalized with COVID-19 in  
14 the New York City Area. *JAMA - J Am Med Assoc.* 2020;323:2052–9.
- 15 22. Grasselli G, Greco M, Zanella A, Albano G, Antonelli M, Bellani G, et al. Risk Factors Associated  
16 With Mortality Among Patients With COVID-19 in Intensive Care Units in Lombardy, Italy  
17 Supplemental content. *JAMA Intern Med.* 2020;180:1345–55.  
18 doi:10.1001/jamainternmed.2020.3539.
- 19 23. ISCIII. Informe sobre la situación de COVID-19 en España. 2020.  
20 [https://www.isciii.es/QueHacemos/Servicios/VigilanciaSaludPublicaRENAVE/EnfermedadesTransmisibles/Documents/INFORMES/Informes COVID-19/Informe nº 32. Situación de COVID-19 en España a](https://www.isciii.es/QueHacemos/Servicios/VigilanciaSaludPublicaRENAVE/EnfermedadesTransmisibles/Documents/INFORMES/Informes COVID-19/Informe nº 32. Situación de COVID-19 en España a 21 de mayo de 2020.pdf)  
21 [21 de mayo de 2020.pdf](https://www.isciii.es/QueHacemos/Servicios/VigilanciaSaludPublicaRENAVE/EnfermedadesTransmisibles/Documents/INFORMES/Informes COVID-19/Informe nº 32. Situación de COVID-19 en España a 21 de mayo de 2020.pdf). Accessed 19 Jan 2021.
- 23 24. Istituto Superiore di Sanità. Characteristics of SARS-CoV-2 patients dying in Italy Report based on  
24 available data on December 16th , 2020. 2020.  
25 [https://www.epicentro.iss.it/en/coronavirus/bollettino/Report-COVID-](https://www.epicentro.iss.it/en/coronavirus/bollettino/Report-COVID-2019_16_december_2020.pdf)  
26 [2019\\_16\\_december\\_2020.pdf](https://www.epicentro.iss.it/en/coronavirus/bollettino/Report-COVID-2019_16_december_2020.pdf).
- 27 25. Zhou F, Yu T, Du R, Fan G, Liu Y, Liu Z, et al. Clinical course and risk factors for mortality of adult  
28 inpatients with COVID-19 in Wuhan, China: a retrospective cohort study. *Lancet.* 2020;395:1054–62.  
29 doi:10.1016/S0140-6736(20)30566-3.
- 30 26. Worldpop, Department of Geography and Geosciences University of Louisville, Department de  
31 Geographie Universite de Namur, CIESIN Columbia University. Global High Resolution Population  
32 Denominators Project. 2018. <https://www.worldpop.org/doi/10.5258/SOTON/WP00647>. Accessed  
33 25 Jun 2020.
- 34 27. Lolli S, Chen YC, Wang SH, Vivone G. Impact of meteorological conditions and air pollution on  
35 COVID-19 pandemic transmission in Italy. *Sci Rep.* 2020;10:1–15. doi:10.1038/s41598-020-73197-8.
- 36 28. Google LLC. Google COVID-19 Community Mobility Reports. 2020.  
37 <https://www.google.com/covid19/mobility/> . Accessed 4 Sep 2020.
- 38 29. Salje H, Kiem C, Lefrancq N, Courtejoie N, Paireau J, Andronico A, et al. Estimating the burden of  
39 SARS-CoV-2 in France To cite this version : HAL Id : pasteur-02548181. 2020.
- 40 30. Wallinga J, Lipsitch M. How generation intervals shape the relationship between growth rates and  
41 reproductive numbers. *Proc R Soc B Biol Sci.* 2007;274:599–604.
- 42 31. Obadia T, Haneef R, Boëlle P. The R0 package : a toolbox to estimate reproduction numbers for  
43 epidemic outbreaks. 2012.

44

1 **Tables**

2 **Table 1: Multivariable model results for the relationship between R0 and weather parameters,**  
 3 **obtained with the hierarchical generalized additive model.** Weather parameters are temperature,  
 4 absolute humidity, and dew point temperature, adjusted for distance to the first region affected,  
 5 population density, and elderly population. Non-linear effects are presented in Figure 6. Models  
 6 assuming linear effects for weather covariates are presented in Table S5.

7

| Model          | Variable                                               | Estimate      | 95%CI          | p-value |
|----------------|--------------------------------------------------------|---------------|----------------|---------|
| <b>Model 1</b> | Intercept                                              | 0.78          | [-0.88 - 2.45] | 0.36152 |
|                | Population density (log10)                             | 0.67          | [0.07 - 1.26]  | 0.03218 |
|                | % population over 80                                   | 0.05          | [-0.08 - 0.18] | 0.44470 |
|                | Distance to first region affected in the country/coast | <b>spline</b> |                | 0.08007 |
|                | <b>Mean temperature</b>                                | <b>spline</b> |                | 0.00655 |
|                | Dev. explained: 41.5%                                  |               |                |         |
| <b>Model 2</b> | Intercept                                              | 1.28          | [-0.36 - 2.92] | 0.13239 |
|                | Population density (log10)                             | 0.50          | [-0.11 - 1.11] | 0.11294 |
|                | % population over 80                                   | 0.03          | [-0.1 - 0.16]  | 0.61862 |
|                | Distance to first region affected in the country/coast | <b>spline</b> |                |         |
|                | <b>Mean AH</b>                                         | <b>spline</b> |                | 0.03401 |
|                | Dev. explained: 33.6%                                  |               |                |         |
| <b>Model 3</b> | Intercept                                              | 1.20          | [-0.47 - 2.88] | 0.16427 |
|                | Population density (log10)                             | 0.49          | [-0.12 - 1.1]  | 0.12005 |
|                | % population over 80                                   | 0.05          | [-0.08 - 0.18] | 0.47092 |
|                | Distance to first region affected in the country/coast | <b>spline</b> |                | 0.09756 |
|                | <b>Mean Dew Point Temperature</b>                      | <b>spline</b> |                | 0.00494 |
|                | Dev. explained: 34.6%                                  |               |                |         |

8

1 **Figures**

2 **Figure 1: Study flow chart**

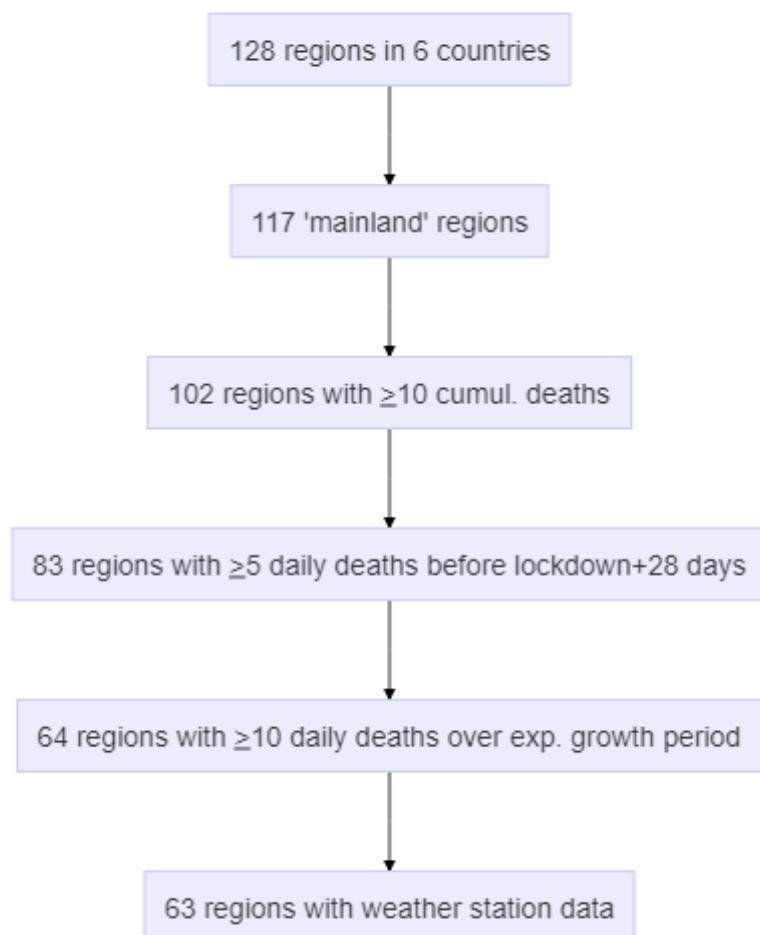

3

1 **Figure 2: Deaths per day, by region and by country.** The thick red line figures the median date of  
2 lockdown by each country, and the thin red line the median date +28 days.

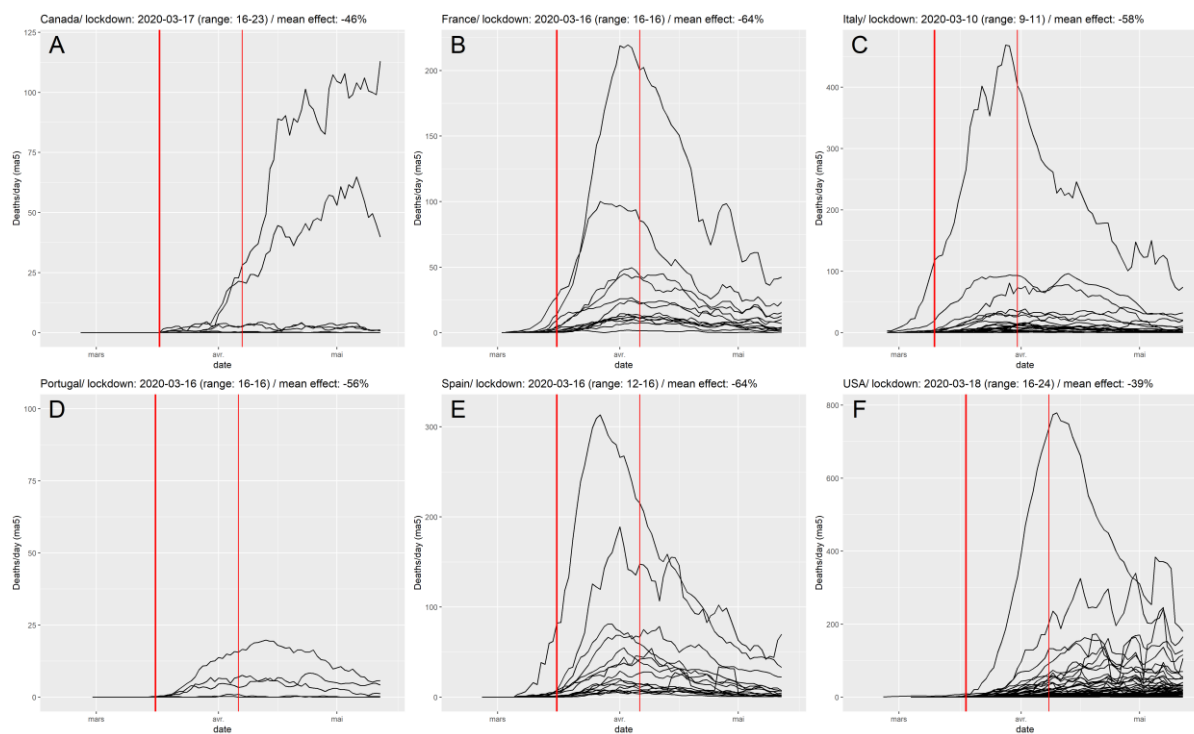

3



1 **Figure 3: Map of regional values for R0 and selected covariates, panels are presented by continent.**  
 2 A,B: R0 ; C,D: population density (inhabitants per km2) ; D,E: mean temperature ; F,G: mean absolute  
 3 humidity.

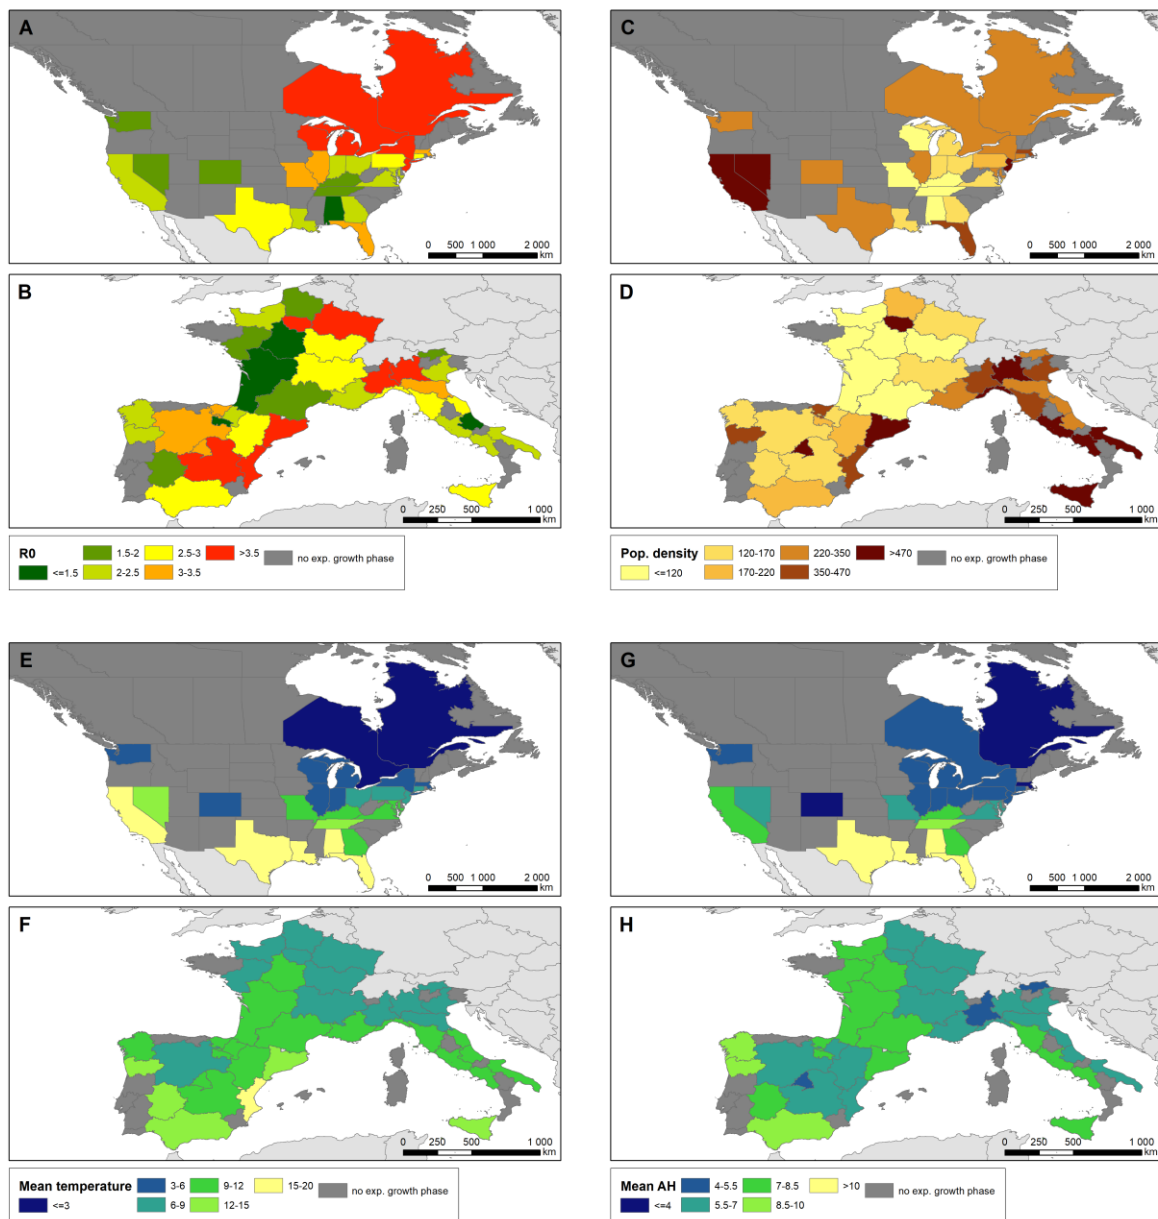

4

1 **Figure 4: Distribution of R0 and selected covariates by country.** A: R0; B: population density (log10  
2 inhabitants/km2); C: Mean absolute humidity (g/m3); D: Mean temperature (°C); E: Population over  
3 80 years old (%); F: distance to the first region affected (km). The box represents the interquartile range  
4 and the median; whiskers correspond to the minimum between highest value and 1.5 IQR; black dots  
5 to outliers. All observations are plotted in light grey.

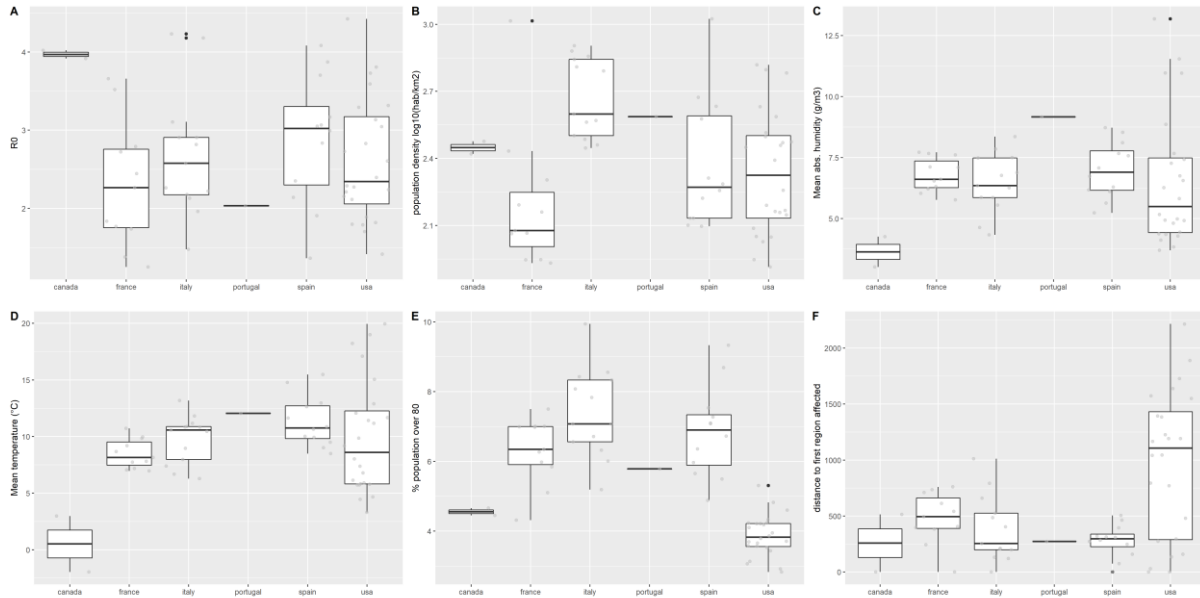

6

1 **Figure 5: Change in R0 on an additive scale estimated from the univariable model assuming a linear**  
2 **relationship between R0 and the different variables.**

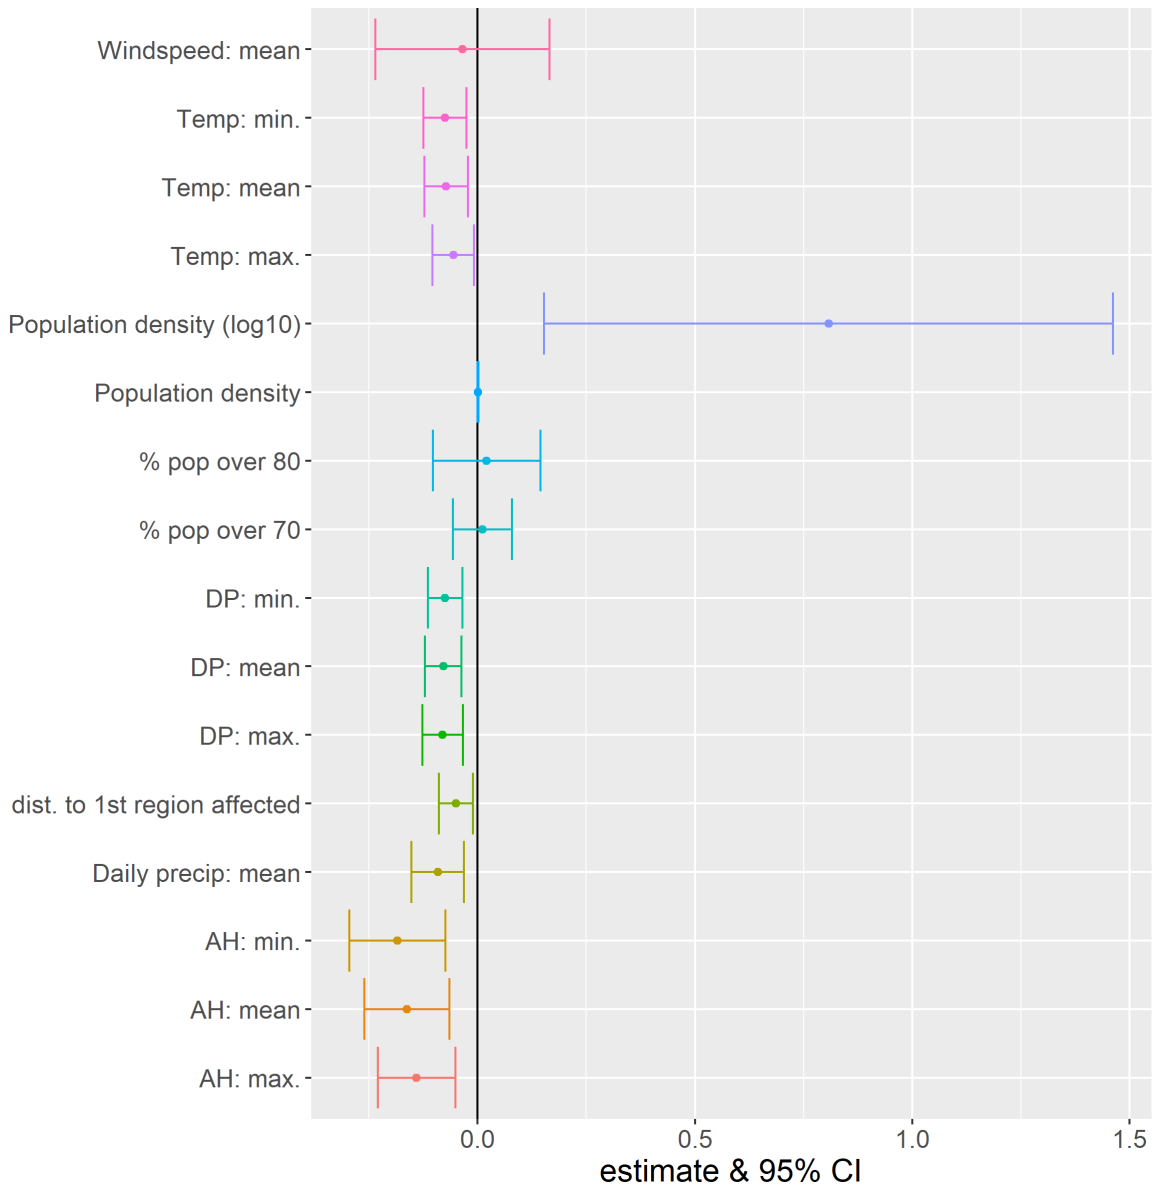

3

1 **Figure 6: Non-linear effects in the multivariable model for weather parameters (see Table 1 for linear**  
2 **effects).** A: Temperature, model 1. B: Distance to first region affected, model 1. C: absolute humidity,  
3 model 2. D: distance to first region affected, model 2. E: dew point temperature, model 3. F: distance  
4 to first region affected, model 3.

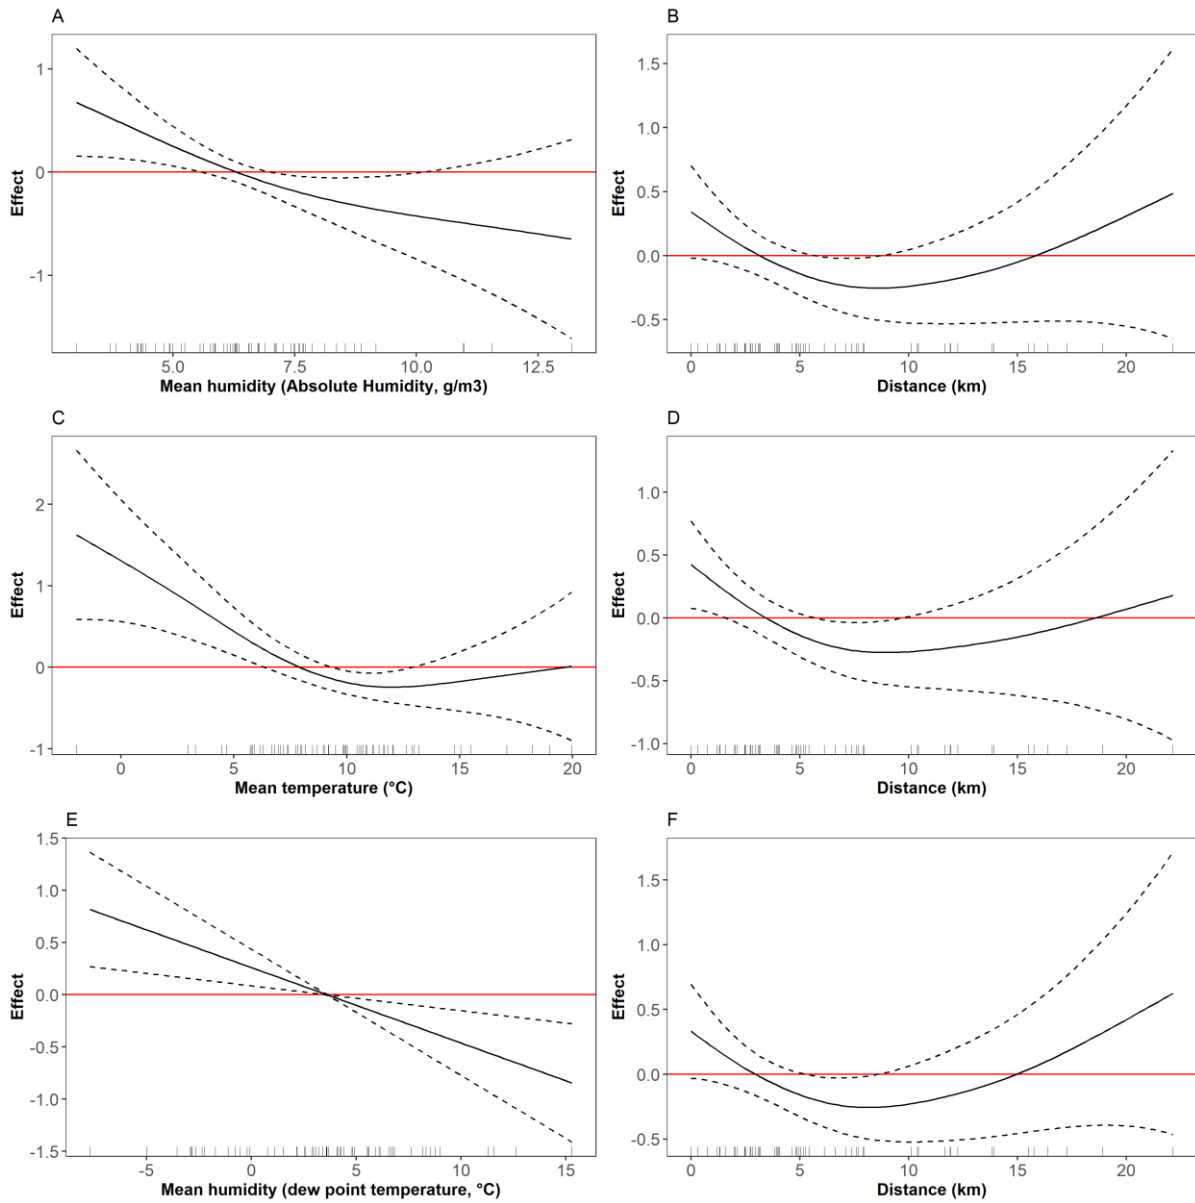

5

6

1 **Figure 7: Summary of estimated effect of temperature (A), absolute humidity (B) or dew point**  
2 **temperature (C) on R0** assuming a region with average population density (248 persons/km<sup>2</sup>) and  
3 percentage of inhabitants >80 years (5.6%), and corresponding to the first region first affected  
4 (distance=0km).

5

6

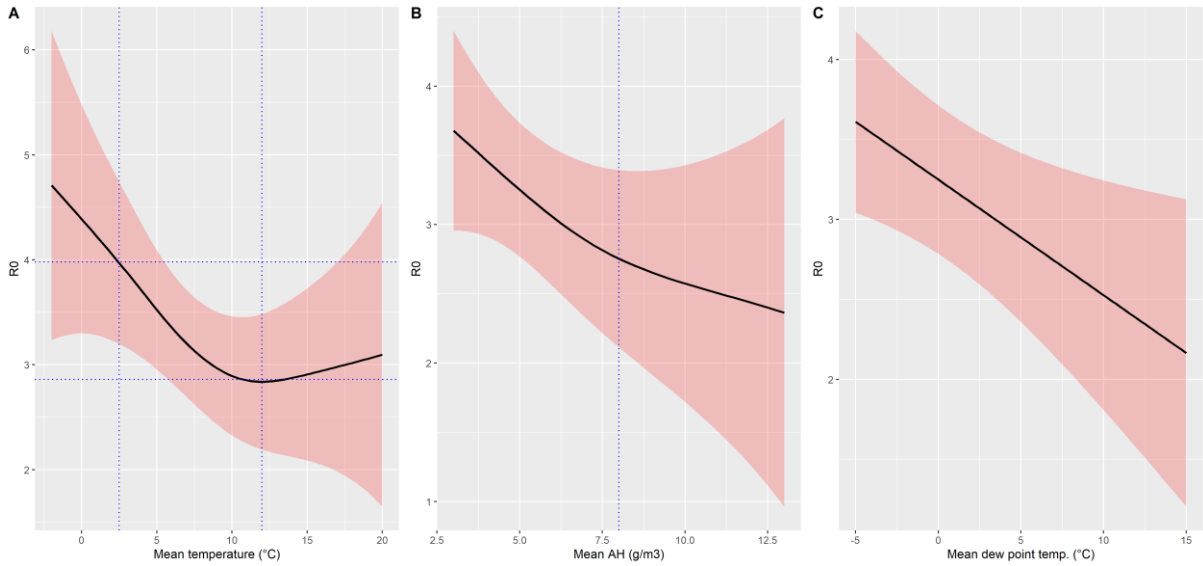

7
